# Supplementary material for: Five-Year Overall Survival and Prognostic Factors in Patients with Lung Cancer: Results from the Korean Association of Lung Cancer Registry (KALC-R) 2015
Source: PubMed Central journal article supplement — Cancer Res Treat. 2022 Jun 20;55(1):103–11. doi: 10.4143/crt.2022.264 (PMC9873320; doi:10.4143/crt.2022.264), 2022-06-20
Supplement: crt-2022-264-S1-Table.pdf [file crt-2022-264-S1-Table.pdf]

**S1 Table.** Initial treatment modalities of NSCLC patients in the year 2015

|                      | Total      | Non-survivor | Survivor   | p-value |
|----------------------|------------|--------------|------------|---------|
| No. of patients      | 2098       | 1446         | 652        |         |
| Initial treatment    |            |              |            |         |
| Surgery              | 557 (26.5) | 116 (8.0)    | 441 (67.6) | < 0.001 |
| RT only              | 174 (8.3)  | 145 (10.0)   | 29 (4.4)   | < 0.001 |
| CCRT                 | 240 (11.4) | 204 (14.1)   | 36 (5.5)   | < 0.001 |
| Chemotherapy         | 335 (16.0) | 277 (19.2)   | 58 (8.9)   | < 0.001 |
| Best supportive care | 491 (23.4) | 450 (31.1)   | 41 (6.3)   | < 0.001 |
| Unknown              | 68 (3.2)   | 61 (4.2)     | 7 (1.1)    | < 0.001 |

Values are presented as number (%). CCRT, concurrent chemoradiation therapy; NSCLC, non-small cell lung cancer; RT, radiation therapy.
