# Supplementary material for: Five-Year Overall Survival and Prognostic Factors in Patients with Lung Cancer: Results from the Korean Association of Lung Cancer Registry (KALC-R) 2015
Source: PubMed Central journal article supplement — Cancer Res Treat. 2022 Jun 20;55(1):103–11. doi: 10.4143/crt.2022.264 (PMC9873320; doi:10.4143/crt.2022.264), 2022-06-20
Supplement: crt-2022-264-S2-Table.pdf [file crt-2022-264-S2-Table.pdf]

**S2 Table.** Initial treatment modalities of NSCLC patients according to clinical stage in the year 2015

|                      | Total      | Non-survivor | Survivor   | p-value |
|----------------------|------------|--------------|------------|---------|
| <b>Stage I</b>       | 390        | 91           | 299        |         |
| Surgery              | 303 (77.7) | 37 (40.7)    | 266 (89.0) | < 0.001 |
| RT only              | 18 (4.6)   | 12 (13.2)    | 6 (2.0)    | < 0.001 |
| CCRT                 | 6 (1.5)    | 4 (4.4)      | 2 (0.7)    | 0.011   |
| Chemotherapy         | 25 (6.4)   | 13 (14.3)    | 12 (4.0)   | < 0.001 |
| Best supportive care | 22 (5.6)   | 17 (18.7)    | 5 (1.7)    | < 0.001 |
| Unknown              | 2 (0.5)    | 2 (2.2)      | 0          | 0.010   |
| <b>Stage II</b>      | 261        | 122          | 139        |         |
| Surgery              | 118 (45.2) | 25 (20.5)    | 93 (66.9)  | < 0.001 |
| RT only              | 34 (13.0)  | 23 (18.9)    | 11 (7.9)   | 0.009   |
| CCRT                 | 13 (5.0)   | 10 (8.2)     | 3 (2.2)    | 0.025   |
| Chemotherapy         | 38 (14.6)  | 17 (13.9)    | 21 (15.1)  | 0.789   |
| Best supportive care | 45 (17.2)  | 35 (28.7)    | 10 (7.2)   | < 0.001 |
| Unknown              | 3 (1.1)    | 3 (2.5)      | 0          | 0.063   |
| <b>Stage III</b>     | 653        | 559          | 94         |         |
| Surgery              | 38 (5.8)   | 18 (3.2)     | 20 (21.3)  | < 0.001 |
| RT only              | 59 (9.0)   | 56 (10.0)    | 3 (3.2)    | 0.033   |
| CCRT                 | 148 (22.7) | 121 (21.6)   | 27 (28.7)  | 0.129   |
| Chemotherapy         | 106 (16.2) | 94 (16.8)    | 12 (12.8)  | 0.325   |
| Best supportive care | 189 (28.9) | 174 (31.1)   | 15 (16.0)  | 0.003   |
| Unknown              | 24 (3.7)   | 21 (3.8)     | 3 (3.2)    | 0.788   |
| <b>Stage IV</b>      | 514        | 471          | 43         |         |
| Surgery              | 26 (5.1)   | 15 (3.2)     | 11 (25.6)  | < 0.001 |
| RT only              | 37 (7.2)   | 34 (7.2)     | 3 (7.0)    | 0.953   |
| CCRT                 | 43 (8.4)   | 42 (8.9)     | 1 (2.3)    | 0.135   |
| Chemotherapy         | 118 (23.0) | 113 (24.0)   | 5 (11.6)   | 0.065   |
| EGFR inhibitors      | 86 (16.7)  | 75 (15.9)    | 11 (25.6)  | 0.492   |
| ALK inhibitors       | 11 (2.1)   | 8 (1.7)      | 3 (7.0)    | 0.207   |
| Best supportive care | 180 (35.0) | 171 (36.3)   | 9 (20.9)   | 0.043   |
| Unknown              | 13 (2.5)   | 13 (2.8)     | 0          | 0.270   |

Values are presented as the number (%). ALK, anaplastic lymphoma kinase; CCRT, concurrent chemoradiation therapy; EGFR, epidermal growth factor receptor; NSCLC, non-small cell lung cancer; RT, radiation therapy.
