# Supplementary material for: Five-Year Overall Survival and Prognostic Factors in Patients with Lung Cancer: Results from the Korean Association of Lung Cancer Registry (KALC-R) 2015
Source: PubMed Central journal article supplement — Cancer Res Treat. 2022 Jun 20;55(1):103–11. doi: 10.4143/crt.2022.264 (PMC9873320; doi:10.4143/crt.2022.264), 2022-06-20
Supplement: crt-2022-264-S3-Table.pdf [file crt-2022-264-S3-Table.pdf]

**S3 Table.** Initial treatment modalities of SCLC patients in the year 2015

|                      | Total      | Non-survivor | Survivor  | p-value |
|----------------------|------------|--------------|-----------|---------|
| No. of patients      | 345        | 321          | 24        |         |
| Initial treatment    |            |              |           |         |
| Surgery              | 1 (0.3)    | 1 (0.3)      | 0         | 0.784   |
| RT only              | 19 (5.5)   | 18 (5.6)     | 1 (4.2)   | 0.765   |
| CCRT                 | 74 (21.4)  | 67 (20.9)    | 7 (29.2)  | 0.340   |
| Chemotherapy         | 91 (26.4)  | 86 (26.8)    | 5 (20.8)  | 0.523   |
| Best supportive care | 150 (43.5) | 140 (43.6)   | 10 (41.7) | 0.853   |
| Unknown              | 10 (2.9)   | 9 (2.8)      | 1 (4.2)   | 0.701   |

Values are presented as number (%). CCRT, concurrent chemoradiation therapy; NSCLC, non-small cell lung cancer; RT, radiation therapy; SCLC, small cell lung cancer.
