# Supplementary material for: Five-Year Overall Survival and Prognostic Factors in Patients with Lung Cancer: Results from the Korean Association of Lung Cancer Registry (KALC-R) 2015
Source: PubMed Central journal article supplement — Cancer Res Treat. 2022 Jun 20;55(1):103–11. doi: 10.4143/crt.2022.264 (PMC9873320; doi:10.4143/crt.2022.264), 2022-06-20
Supplement: crt-2022-264-S4-Table.pdf [file crt-2022-264-S4-Table.pdf]

**S4 Table.** Baseline characteristics of patients with stage IV adenocarcinoma in 2015

|                          | Total            | Non-survivor     | Survivor         | p-value |
|--------------------------|------------------|------------------|------------------|---------|
| No. of patients          | 348              | 310              | 38               |         |
| Male sex                 | 212 (60.9)       | 192 (61.9)       | 20 (52.6)        | 0.267   |
| Age (yr)                 | 69.0 (59.0-75.0) | 70.0 (59.8-76.0) | 62.0 (56.0-72.3) | 0.058   |
| Ever-smoker              | 181 (52.0)       | 163 (52.6)       | 18 (47.4)        | 0.518   |
| BMI (kg/m <sup>2</sup> ) | 21.0 (20.2-21.7) | 20.9 (20.0-21.6) | 22.1 (19.7-24.3) | 0.300   |
| Symptoms                 | 342              | 305              | 37               |         |
| Asymptomatic             | 22 (6.4)         | 19 (6.2)         | 3 (8.1)          | 0.673   |
| Cough                    | 120 (35.1)       | 109 (35.7)       | 11 (29.7)        | 0.447   |
| Sputum                   | 53 (15.5)        | 47 (15.4)        | 6 (16.2)         | 0.919   |
| Dyspnea                  | 93 (27.2)        | 85 (27.9)        | 8 (21.6)         | 0.403   |
| Hoarseness               | 9 (2.6)          | 7 (2.3)          | 2 (5.4)          | 0.271   |
| Hemoptysis               | 10 (2.9)         | 9 (3.0)          | 1 (2.7)          | 0.925   |
| Weight loss              | 26 (7.6)         | 24 (7.9)         | 2 (5.4)          | 0.583   |
| Pain                     | 92 (26.9)        | 87 (28.5)        | 5 (13.5)         | 0.049   |
| Performance status       | 255              | 225              | 30               | 0.162   |
| 0-1                      | 216 (84.7)       | 188 (83.6)       | 28 (93.3)        |         |
| 2-4                      | 39 (15.3)        | 37 (16.4)        | 2 (6.7)          |         |
| EGFR                     | 118/304 (38.8)   | 101/270 (37.4)   | 17/34 (50.0)     | 0.328   |
| ALK                      | 19/233 (8.2)     | 12/209 (5.7)     | 7/24 (29.2)      | <0.001  |

Values are presented as the number (%) or median (interquartile range). ALK, anaplastic lymphoma kinase; BMI, body mass index; EGFR, epidermal growth factor receptor.
