# Supplementary material for: Five-Year Overall Survival and Prognostic Factors in Patients with Lung Cancer: Results from the Korean Association of Lung Cancer Registry (KALC-R) 2015
Source: PubMed Central journal article supplement — Cancer Res Treat. 2022 Jun 20;55(1):103–11. doi: 10.4143/crt.2022.264 (PMC9873320; doi:10.4143/crt.2022.264), 2022-06-20
Supplement: crt-2022-264-S5-Table.pdf [file crt-2022-264-S5-Table.pdf]

**S5 Table.** Risk factors for mortality in patients with stage IV adenocarcinoma assessed by Cox proportional hazards model

|                    | Univariate analysis |             |         | Multivariable analysis |             |         |
|--------------------|---------------------|-------------|---------|------------------------|-------------|---------|
|                    | Hazard ratio        | 95% CI      | p-value | Hazard ratio           | 95% CI      | p-value |
| Age                | 1.023               | 1.013-1.022 | < 0.001 | 1.014                  | 1.000-1.028 | 0.053   |
| Male sex           | 1.439               | 1.143-1.812 | 0.002   | 0.853                  | 0.522-1.394 | 0.525   |
| Ever-smoker        | 1.405               | 1.122-1.760 | 0.003   | 1.756                  | 1.080-2.855 | 0.023   |
| BMI                | 0.995               | 0.980-1.010 | 0.536   |                        |             |         |
| Performance status |                     |             |         |                        |             |         |
| 0-1 (ref)          | 1.000               |             |         | 1.000                  |             |         |
| 2-4                | 2.327               | 1.630-3.323 | < 0.001 | 1.675                  | 1.082-2.594 | 0.021   |
| EGFR               | 0.651               | 0.508-0.834 | < 0.001 | 0.977                  | 0.552-1.732 | 0.937   |
| ALK                | 0.442               | 0.246-0.792 | 0.006   | 0.416                  | 0.150-1.155 | 0.092   |
| Treatment          |                     |             |         |                        |             |         |
| BSC (ref)          | 1.000               |             |         | 1.000                  |             |         |
| EGFR inhibitor     | 0.504               | 0.371-0.685 | < 0.001 | 0.468                  | 0.262-0.835 | 0.010   |
| ALK inhibitor      | 0.477               | 0.232-0.984 | 0.045   | 1.629                  | 0.448-5.928 | 0.459   |
| Chemotherapy       | 0.800               | 0.589-1.087 | 0.154   | 0.711                  | 0.471-1.071 | 0.103   |

ALK, anaplastic lymphoma kinase; BMI, body mass index; BSC, best supportive care; CI, confidence interval; EGFR, epidermal growth factor receptor.
