# Supplementary material for: Five-Year Overall Survival and Prognostic Factors in Patients with Lung Cancer: Results from the Korean Association of Lung Cancer Registry (KALC-R) 2015
Source: PubMed Central journal article supplement — Cancer Res Treat. 2022 Jun 20;55(1):103–11. doi: 10.4143/crt.2022.264 (PMC9873320; doi:10.4143/crt.2022.264), 2022-06-20
Supplement: crt-2022-264-S6-Fig..pdf [file crt-2022-264-S6-Fig..pdf]

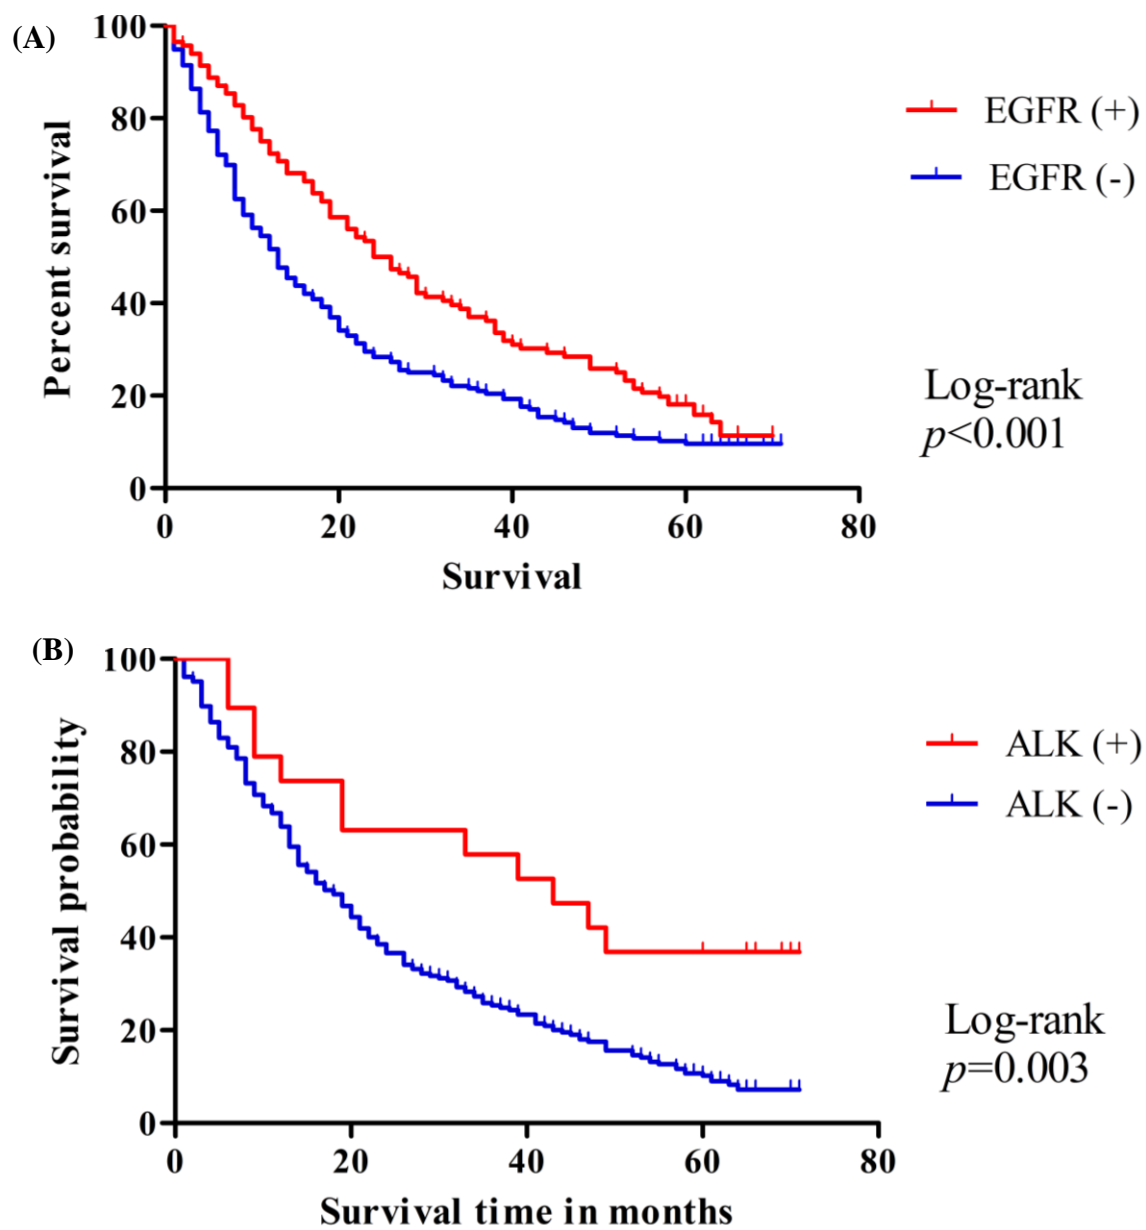

**S6 Fig.** Overall survival in patients with stage IV adenocarcinoma, according to epidermal growth factor receptor (*EGFR*) mutation (A) and anaplastic lymphoma kinase (*ALK*) aberration (B).
